# Supplementary material
Source: MDPI journal article supplement (https://www.mdpi.com/2674-0621/4/2/6)
Supplement: s1 [file s1]

Supplementary

# Anti-IL-6 Receptor Treatment in Giant Cell Arteritis Patients Reduces Levels of IL-1 $\beta$ -Receptor Antagonist but Not IL-1 $\beta$

Joana J. da Costa <sup>1,2,3</sup>, Lisa Christ <sup>4</sup>, Peter M. Villiger <sup>5</sup>, Monique Vogel <sup>1,2</sup> and Martin F. Bachmann <sup>1,2,6\*</sup>

<sup>1</sup> Department of Immunology, University Clinic for Rheumatology and Immunology, University of Bern, 3012 Bern, Switzerland; joana.jorgedacosta@dbmr.unibe.ch (J.J.d.C.); monique.voguel@unibe.ch (M.V.)

<sup>2</sup> Department of Biomedical Research Bern (DBMR), University of Bern, 3012 Bern, Switzerland

<sup>3</sup> Graduate School for Cellular and Biomedical Sciences (GCB), University of Bern, 3012 Bern, Switzerland

<sup>4</sup> Department of Rheumatology and Immunology, Inselspital, Bern University Hospital, University of Bern, 3012 Bern, Switzerland; lisa.christ@insel.ch

<sup>5</sup> Medical Center Monbijou, 3011 Bern, Switzerland; peter.villiger@hin.ch

<sup>6</sup> Nuffield Department of Medicine, The Jenner Institute, University of Oxford, Oxford OX3 7DQ, UK;

\* Correspondence: martin.bachmann@unibe.ch

**Table S1:** Immunological markers studied from phase II RCT

| undetectable Biomarkers (N=18)<br>Biomarkers with non-significant |                         | undetectable Biomarkers (N=18)<br>Biomarkers with non-significant |               | undetectable Biomarkers<br>(N=18) Biomarkers with<br>non-significant |
|-------------------------------------------------------------------|-------------------------|-------------------------------------------------------------------|---------------|----------------------------------------------------------------------|
| IL-2                                                              | IL-34                   | APRIL/TNFSF13                                                     | MMP-2         | Pentraxin-3                                                          |
| IL-10                                                             | IL-32                   | BAFF/TNFSF13B                                                     | ICAM-1        | MMP-3                                                                |
| L-11                                                              | IL-29/IFN- $\lambda$ 1  | sCD30/TNFSF8                                                      | hsCRP         | sCD163                                                               |
| IL-12(p40)                                                        | IL-28A/IFN- $\lambda$ 2 | Chitinase-3-<br>like1/YKL-40                                      | Osteopontin   | IL-6                                                                 |
| IL-12(p70)                                                        | IL-27(p28)              | gp130/sIL-6R $\beta$                                              | sTNFR1        | sIL-6R                                                               |
| IL17A                                                             | IFN- $\gamma$           | IFN- $\alpha$ 2                                                   | sTNFR2        |                                                                      |
| IL-20                                                             | MMP-1                   | IFN- $\beta$                                                      | TSLP          |                                                                      |
| IL-22                                                             | Osteocalcin             | sCD25/IL-R2                                                       | TWEAK/TNFSF12 |                                                                      |
| IL-26                                                             | VCAM-1                  | IL-8                                                              | Leptin        |                                                                      |
|                                                                   | IL-19                   | Resistin                                                          |               |                                                                      |
|                                                                   | L-35                    | Adiponectin                                                       |               |                                                                      |
|                                                                   | LIGHT/TNFSF14           |                                                                   |               |                                                                      |
